# Supplementary material for: Association of Adjuvant Hormone Therapy Timing With Overall Survival Among Patients With Hormone Receptor–Positive Human Epidermal Growth Factor Receptor-2–Negative Early Breast Cancer Without Chemotherapy
Source: PubMed Central journal article supplement (PMC8848199; doi:10.1001/jamanetworkopen.2021.45934), 2022-02-15

## Supplemental Online Content

Fu F, Yu L, Zeng B, et al. Association of adjuvant hormone therapy timing with overall survival among patients with hormone receptor–positive human epidermal growth factor receptor-2–negative early breast cancer without chemotherapy. *JAMA Netw Open.* 2022;5(2):e2145934.  
doi:10.1001/jamanetworkopen.2021.45934

**eTable 1.** Missing Variables Data

**eTable 2.** Sensitivity Analyses Regarding the Association of TTH >150 Versus TTH ≤150 with OS

**eFigure.** Flow Diagram of Exclusions for National Cancer Database (NCDB)

This supplemental material has been provided by the authors to give readers additional information about their work.

**eTable 1. Missing Variables Data.**

| Variable                                                                   | NCDB Missing (n)* |
|----------------------------------------------------------------------------|-------------------|
| Age                                                                        | 0                 |
| Sex                                                                        | 0                 |
| Race                                                                       | 0                 |
| Insurance type                                                             | 0                 |
| Setting                                                                    | 3757              |
| Facility type                                                              | 0                 |
| Charlson Comorbidity Index (CCI)                                           | 0                 |
| Histology                                                                  | 0                 |
| Grade                                                                      | 0                 |
| Pathological stage                                                         | 0                 |
| Hormone receptor                                                           | 0                 |
| Surgery                                                                    | 29                |
| Radiotherapy                                                               | 310               |
| *Not exclusive: some patients may have had more than one variable missing. |                   |

**eTable 2. Sensitivity Analyses Regarding the Association of TTH>150 Versus TTH≤150 with OS**

| <b>Model</b>                                     | <b>Hazard Ratio (95% CI)</b> | <b>P Value</b> |
|--------------------------------------------------|------------------------------|----------------|
| Unweighted                                       | 1.32 (1.19-1.47)             | < .001         |
| Propensity score based                           |                              |                |
| Weighted (IPTW)                                  | 1.31 (1.26-1.35)             | < .001         |
| IPTW with stabilized weight                      | 1.31 (1.19-1.45)             | < .001         |
| IPTW with a generalized boosted regression model | 1.23 (1.18-1.27)             | < .001         |
| Propensity Score Matching (PSM) <sup>a</sup>     | 1.41 (1.13-1.76)             | .002           |
| PS regression adjustment                         | 1.29 (1.16-1.43)             | < .001         |

Abbreviations: IPTW, inverse probability of treatment weighting; OS, overall survival; PS, propensity score.

<sup>a</sup>Propensity score matching (PSM) was conducted using the nearest neighbour-matching with different calipers values (0.5, 0.1, 0.01, 0.001) for 1:1 matching and 0.5 for 1:2 matching. All results are stable. The result of a 1:1 match with a caliper of 0.001 was shown here.

**eFigure 1. Flow Diagram of Exclusions for National Cancer Database (NCDB)**

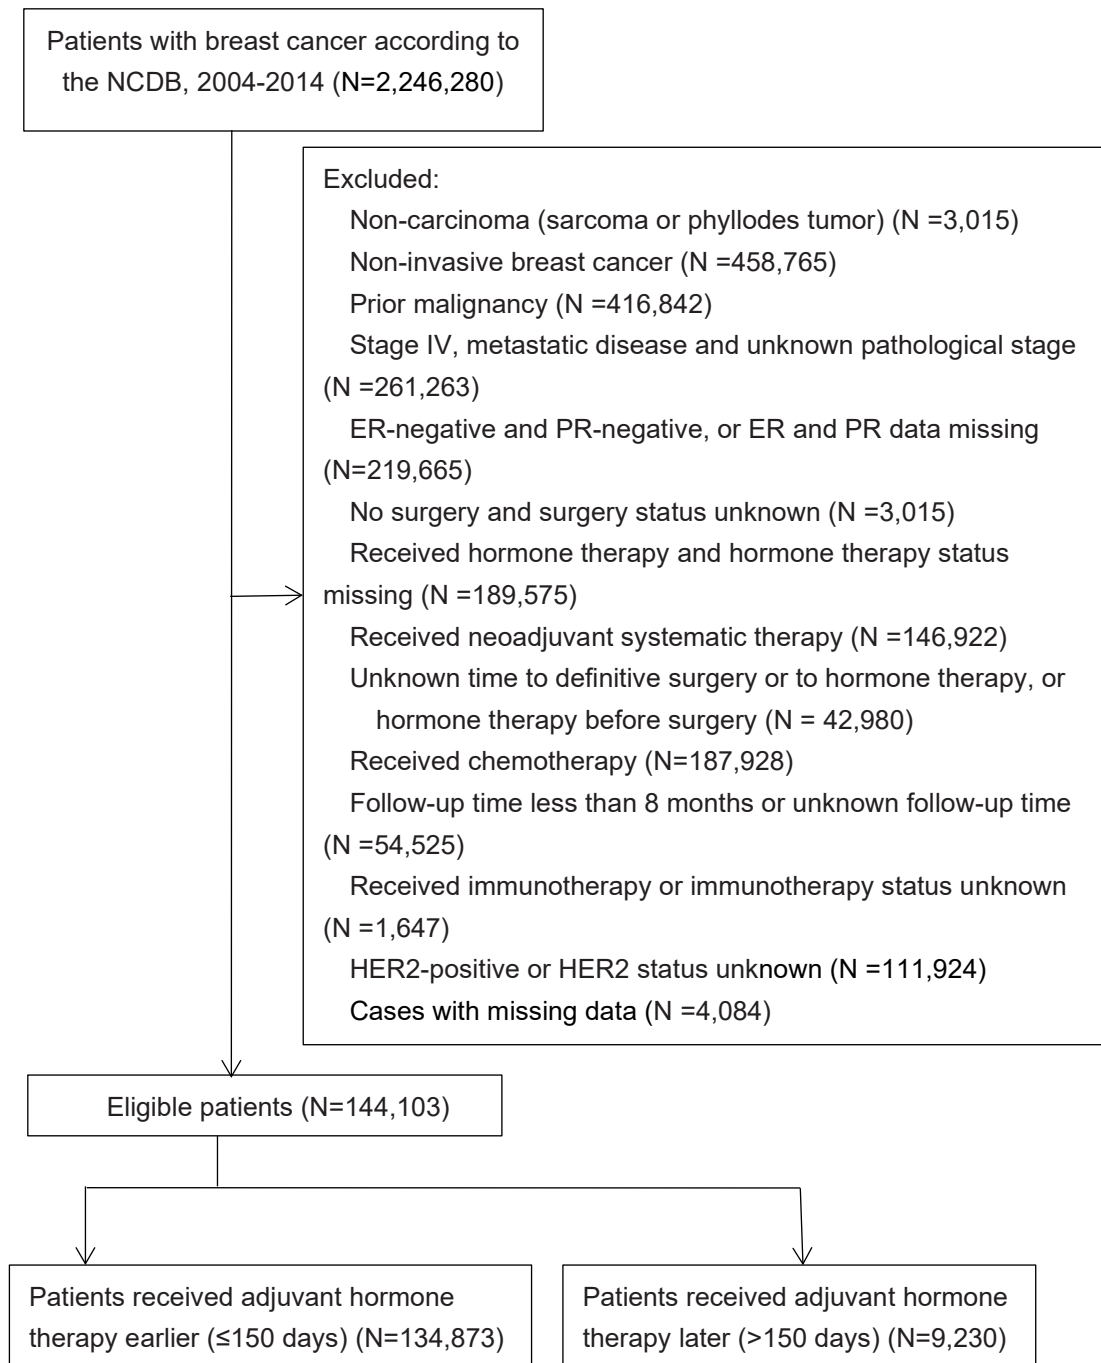

Supplement: jamanetwopen-e2145934-s001.pdf [file jamanetwopen-e2145934-s001.pdf]
